# Supplementary material
Source: ML conference proceedings conference paper supplement (https://openaccess.thecvf.com/content/cvpr_2017/html/Zhang_Deep_TEN_Texture_2017_CVPR_paper.html)
Supplement: Supplementary file 1 [file Zhang_Deep_TEN_Texture_2017_CVPR_supplemental.pdf]

# Deep TEN: Texture Encoding Network

## Supplementary Material

Hang Zhang Jia Xue Kristin Dana

Department of Electrical and Computer Engineering, Rutgers University, New Brunswick, USA

{zhang.hang, jia.xue}@rutgers.edu, kdana@ece.rutgers.edu

### Encoding Layer Implementations

This supplementary material provides the explicit expression for the gradients of the loss  $\ell$  with respect to (*w.r.t*) the layer input and the parameters for implementing Encoding Layer. The  $L2$ -normalization as a standard component is used outside the encoding layer.

**Gradients w.r.t Input  $X$**  The encoder  $E = \{e_1, \dots, e_K\}$  can be viewed as  $k$  independent sub-encoders. Therefore the gradients of the loss function  $\ell$  *w.r.t* input descriptor  $x_i$  can be accumulated  $\frac{d\ell}{dx_i} = \sum_{k=1}^K \frac{d\ell}{de_k} \cdot \frac{de_k}{dx_i}$ . According to the chain rule, the gradients of the encoder *w.r.t* the input is given by

$$\frac{de_k}{dx_i} = r_{ik}^T \frac{da_{ik}}{dx_i} + a_{ik} \frac{dr_{ik}}{dx_i}, \quad (1)$$

where  $a_{ik}$  and  $r_{ik}$  are defined in Sec 2 of the main paper,  $\frac{dr_{ik}}{dx_i} = 1$ . Let  $f_{ik} = e^{-s_k \|r_{ik}\|^2}$  and  $h_i = \sum_{m=1}^K f_{im}$ , we can write  $a_{ik} = \frac{f_{ik}}{h_i}$ . The derivatives of the assigning weight *w.r.t* the input descriptor is

$$\frac{da_{ik}}{dx_i} = \frac{1}{h_i} \cdot \frac{df_{ik}}{dx_i} - \frac{f_{ik}}{(h_i)^2} \cdot \sum_{m=1}^K \frac{df_{im}}{dx_i}, \quad (2)$$

where  $\frac{df_{ik}}{dx_i} = -2s_k f_{ik} \cdot r_{ik}$ .

**Gradients w.r.t Codewords  $C$**  The sub-encoder  $e_k$  only depends on the codeword  $c_k$ . Therefore, the gradient of loss function *w.r.t* the codeword is given by  $\frac{d\ell}{dc_k} = \frac{d\ell}{de_k} \cdot \frac{de_k}{dc_k}$ .

$$\frac{de_k}{dc_k} = \sum_{i=1}^N \left( r_{ik}^T \frac{da_{ik}}{dc_k} + a_{ik} \frac{dr_{ik}}{dc_k} \right), \quad (3)$$

where  $\frac{dr_{ik}}{dc_k} = -1$ . Let  $g_{ik} = \sum_{m \neq k} f_{im}$ . According to the chain rule, the derivatives of assigning *w.r.t* the codewords

can be written as

$$\frac{da_{ik}}{dc_k} = \frac{da_{ik}}{df_{ik}} \cdot \frac{df_{ik}}{dc_k} = \frac{2s_k f_{ik} g_{ik}}{(h_i)^2} \cdot r_{ik}. \quad (4)$$

**Gradients w.r.t Smoothing Factors** Similar to the code-words, the sub-encoder  $e_k$  only depends on the  $k$ -th smoothing factor  $s_k$ . Then, the gradient of the loss function *w.r.t* the smoothing weight is given by  $\frac{d\ell}{ds_k} = \frac{d\ell}{de_k} \cdot \frac{de_k}{ds_k}$ .

$$\frac{de_k}{ds_k} = -\frac{f_{ik} g_{ik} \|r_{ik}\|^2}{(h_i)^2} \quad (5)$$

**Note** In practice, we multiply the numerator and denominator of the assigning weight with  $e^{\phi_i}$  to avoid overflow:

$$a_{ik} = \frac{\exp(-s_k \|r_{ik}\|^2 + \phi_i)}{\sum_{j=1}^K \exp(-s_j \|r_{ij}\|^2 + \phi_i)}, \quad (6)$$

where  $\phi_i = \min_k \{s_k \|r_{ik}\|^2\}$ . Then  $\frac{df_{ik}}{dx_i} = e^{\phi_i} \frac{f_{ik}}{dx_i}$ .

A Torch implementation is provided in supplementary material and available at <https://github.com/zhanghang1989/Deep-Encoding>.
